# Supplementary material for: Regulating the phase stability and bandgap of quasi-2D Dion–Jacobson CsSnI3 perovskite via intercalating organic cations
Source: Royal Society of Chemistry journal article supplement (doi:10.1039/d1ta10246j), 2022-01-01
Supplement: d1ta10246j1.pdf [file d1ta10246j1.pdf]

## Supporting Information

### **Regulating the Phase Stability and Bandgap of Quasi-2D Dion–Jacobson CsSnI<sub>3</sub> Perovskite *via* Intercalating Organic Cations**

*Qian Sun,<sup>1,2</sup> Zhi Fang,<sup>1,2</sup> Yapeng Zheng,<sup>1,2</sup> Zuobao Yang,<sup>2</sup> Feng Hu,<sup>2</sup> Yang Yang,<sup>2</sup> Weiyu Yang,<sup>2</sup>*

*Xinmei Hou,<sup>1,\*</sup> and Ming-Hui Shang<sup>2,3,\*</sup>*

<sup>1</sup> Beijing Advanced Innovation Center for Materials Genome Engineering, Collaborative Innovation Center of Steel Technology, University of Science and Technology Beijing, Beijing 100083, China.

<sup>2</sup> Institute of Micro/Nano Materials and Devices, Ningbo University of Technology, Ningbo City 315016, P. R. China.

<sup>3</sup> Graduate School of Advanced Integration Science, Chiba University, 1-33 Yayoi-cho, Inage, Chiba 263-8522, Japan.

\*To whom correspondence should be addressed: Email: [houxinmeiustb@ustb.edu.cn](mailto:houxinmeiustb@ustb.edu.cn) (X. Hou), [shangminghui@nbut.edu.cn](mailto:shangminghui@nbut.edu.cn) (M.-H. Shang).

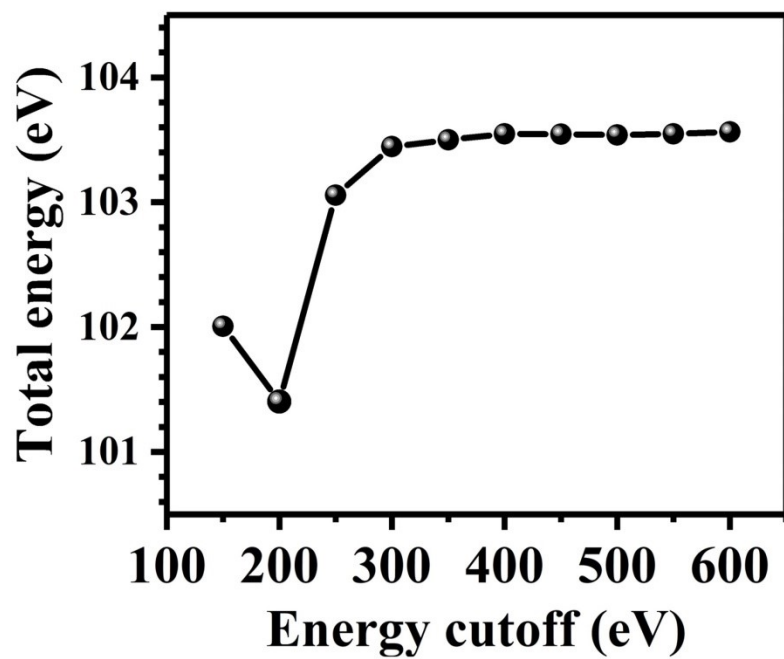

**Figure S1.** The convergence test of different cutoff energy of quasi-2D DJ (ThDMA) $\text{Cs}_{n-1}\text{Sn}_n\text{I}_{3n+1}$  perovskites.

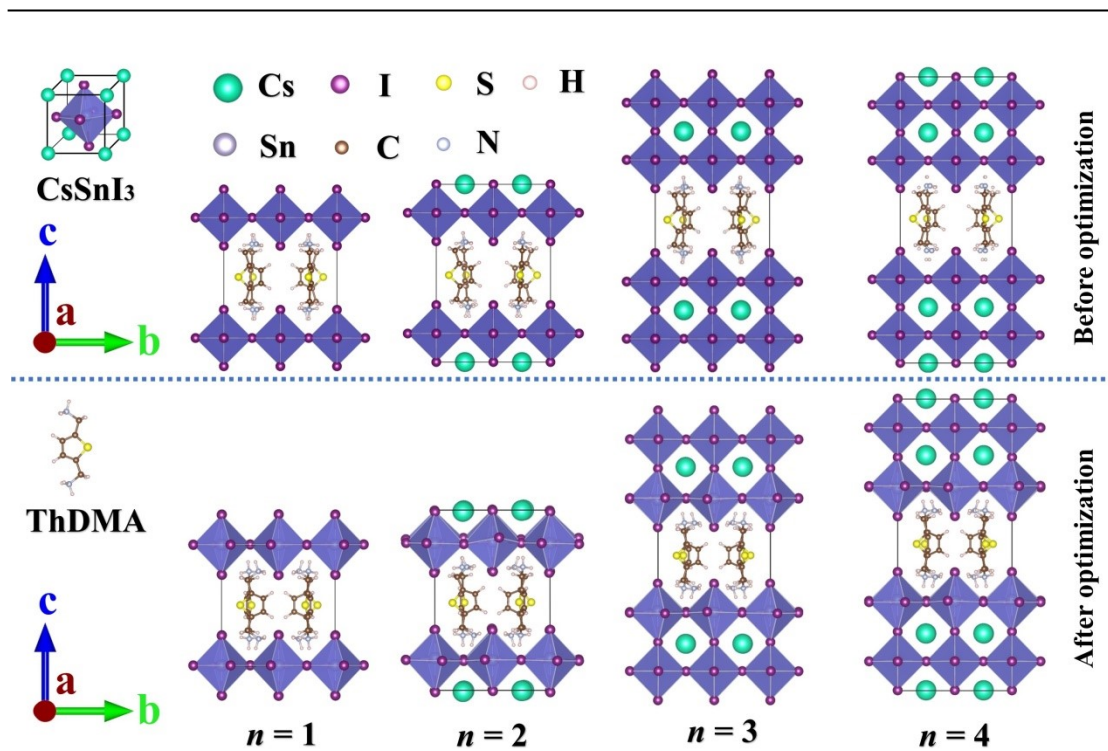

**Figure S2.** Configurations before/after geometry optimization of quasi-2D DJ (ThDMA)Cs<sub>*n*-1</sub>Sn<sub>*n*</sub>I<sub>3*n*+1</sub> perovskites from *n* = 1 to 4. The structures of CsSnI<sub>3</sub> unit and cation ThDMA<sup>2+</sup> are given in illustration.

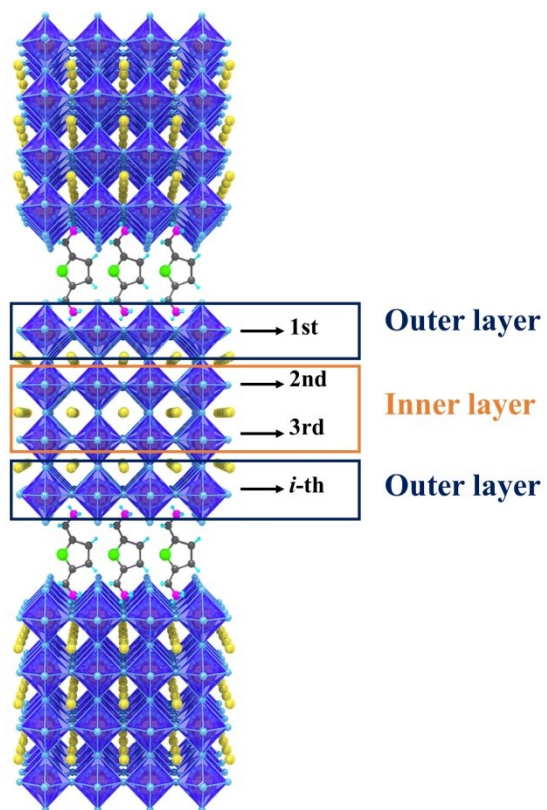

**Figure S3.** Illustration on serial numbers of  $i$ -th inorganic layer and the definition of outer and inner layer.

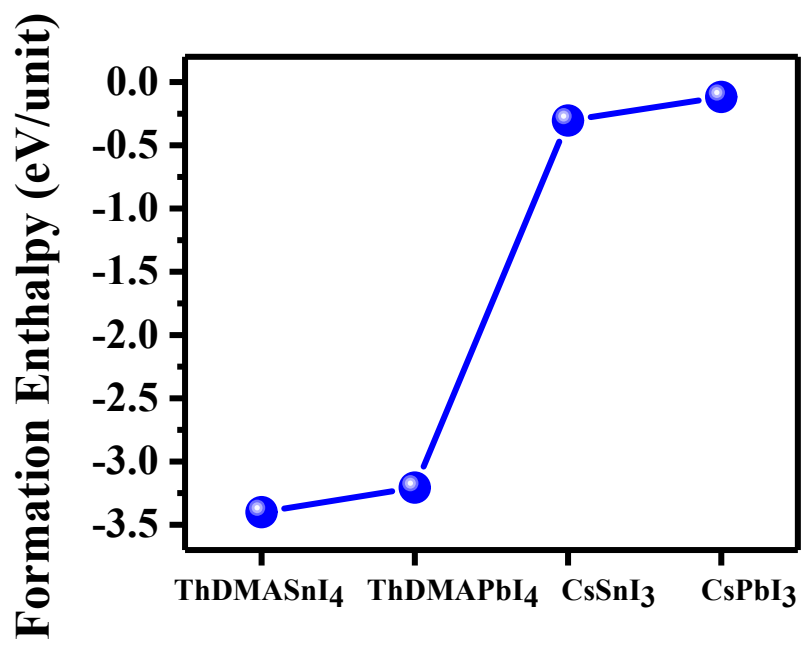

**Figure S4.** Formation enthalpies of ThDMAPbI<sub>4</sub>, ThDMASnI<sub>4</sub>, CsPbI<sub>3</sub> and CsSnI<sub>3</sub> perovskites.

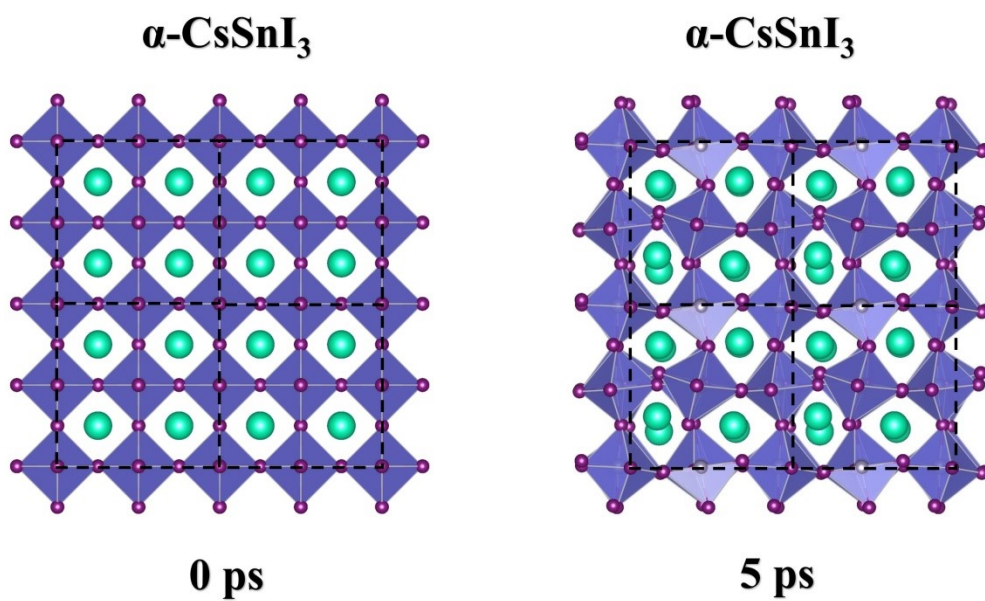

**Figure S5.** The structures of CsSnI<sub>3</sub> perovskites after AIMD simulation at 0 and 5 ps under 300 K, respectively.



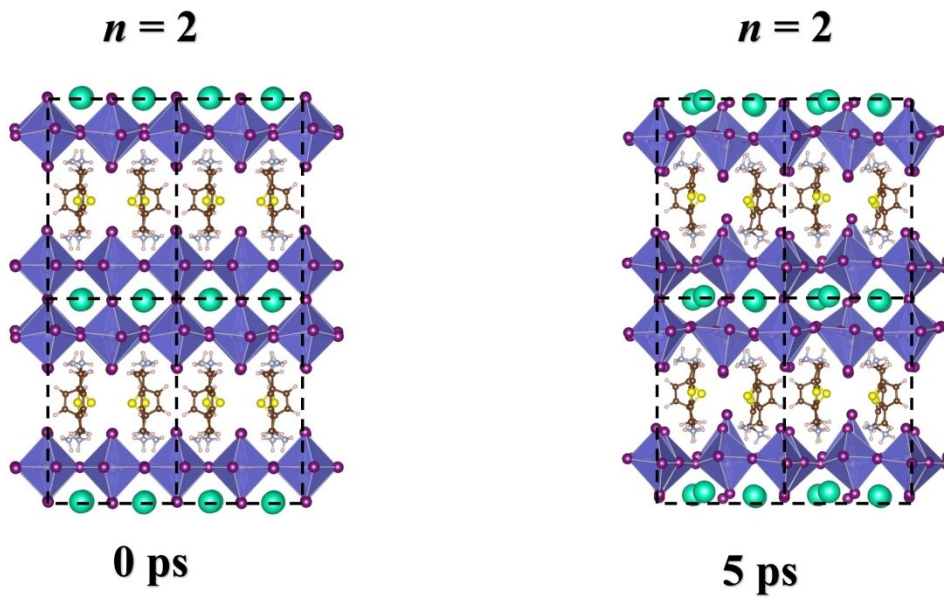

**Figure S7.** The structures of  $(\text{ThDMA})\text{Cs}_{n-1}\text{Sn}_n\text{I}_{3n+1}$  ( $n = 2$ ) perovskites after AIMD simulation at 0 and 5 ps under 300 K, respectively.



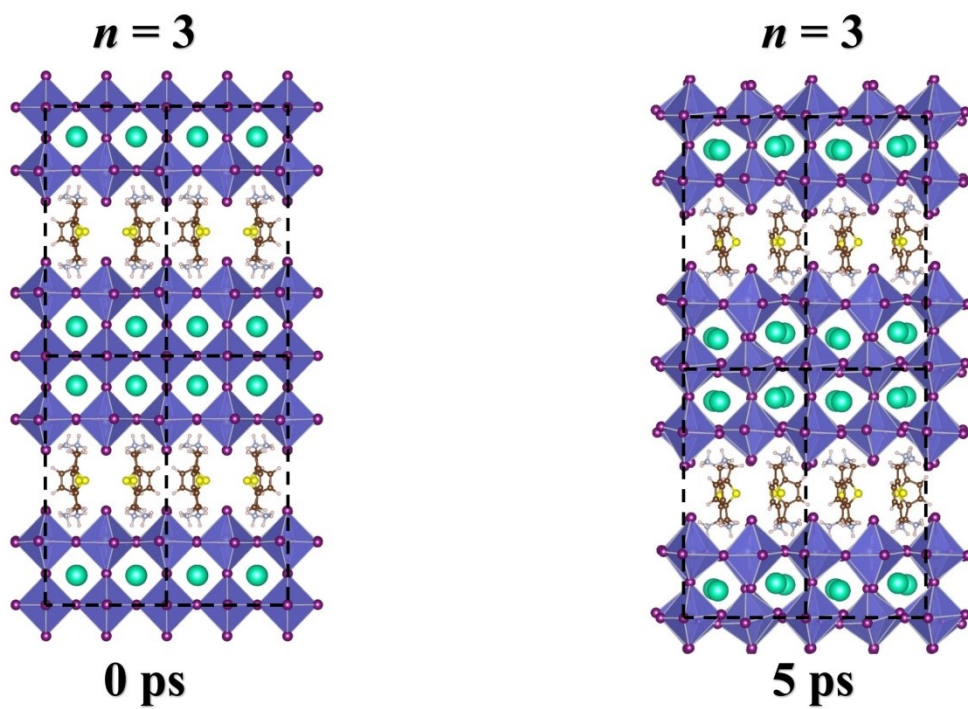

**Figure S8.** The structures of  $(\text{ThDMA})\text{Cs}_{n-1}\text{Sn}_n\text{I}_{3n+1}$  ( $n = 3$ ) perovskites after AIMD simulation at 0 and 5 ps under 300 K, respectively.

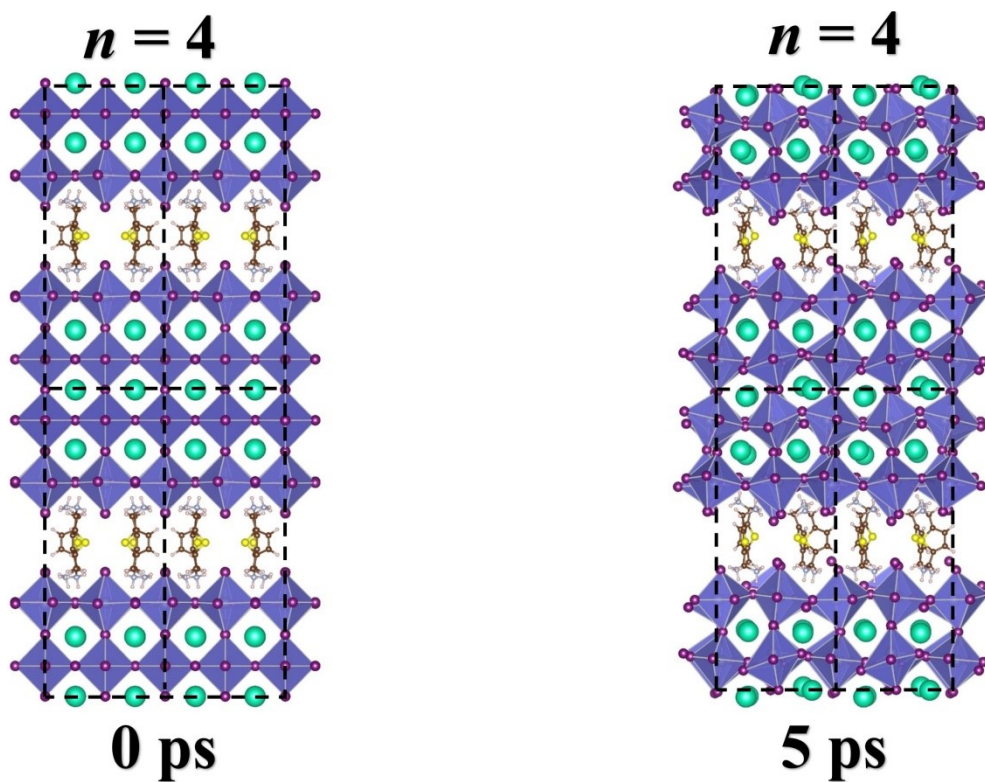

**Figure S9.** The structures of  $(\text{ThDMA})\text{Cs}_{n-1}\text{Sn}_n\text{I}_{3n+1}$  ( $n = 4$ ) perovskites after AIMD simulation at 0 and 5 ps under 300 K, respectively.

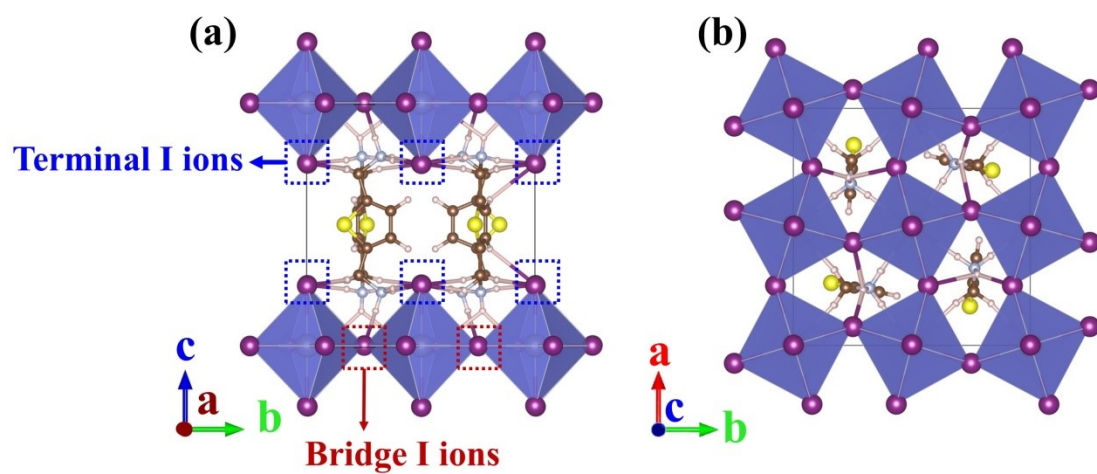

**Figure S10.** Illustration on I-H bonds of  $(\text{ThDMA})\text{Cs}_{n-1}\text{Sn}_n\text{I}_{3n+1}$  ( $n = 1$ ).

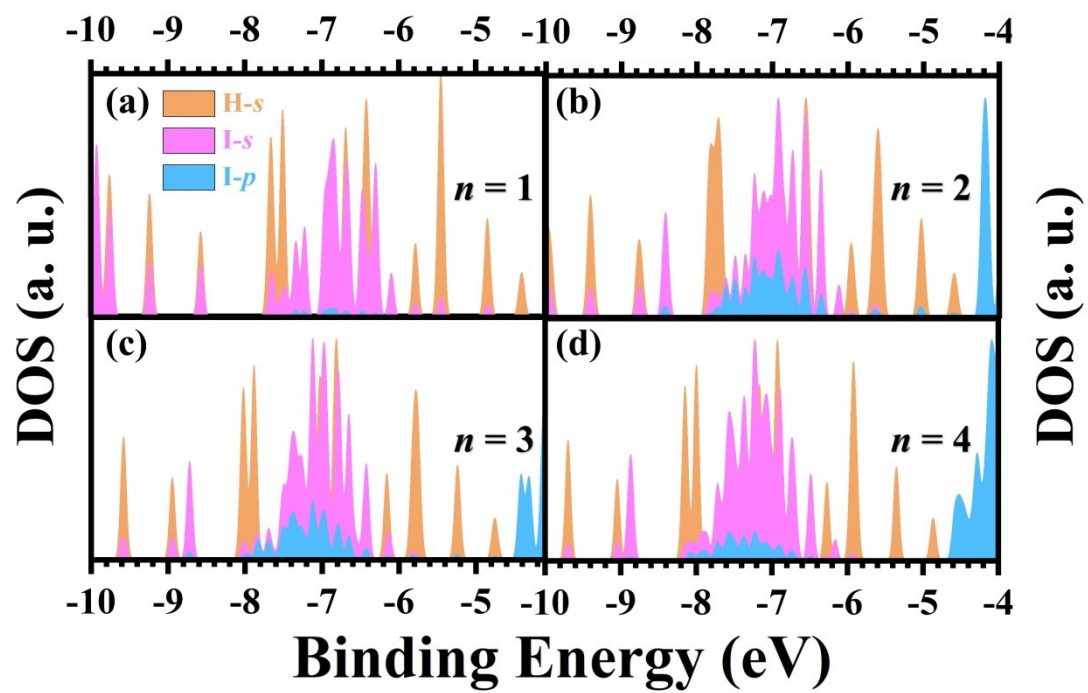

**Figure S11.** (a-d) Calculated PDOS of I and H atoms from I-H bonds of  $(\text{ThDMA})\text{Cs}_{n-1}\text{Sn}_n\text{I}_{3n+1}$  ( $n = 1-4$ ), respectively.

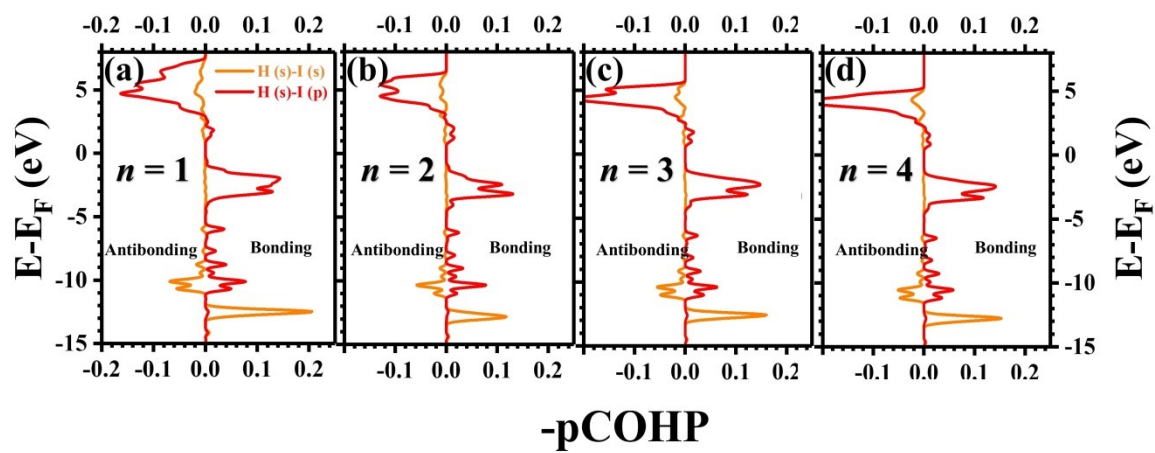

**Figure S12.** (a-d) Orbital-resolved COHP analysis for H and I atom of  $(\text{ThDMA})\text{Cs}_{n-1}\text{Sn}_n\text{I}_{3n+1}$  ( $n = 1-4$ ), respectively.

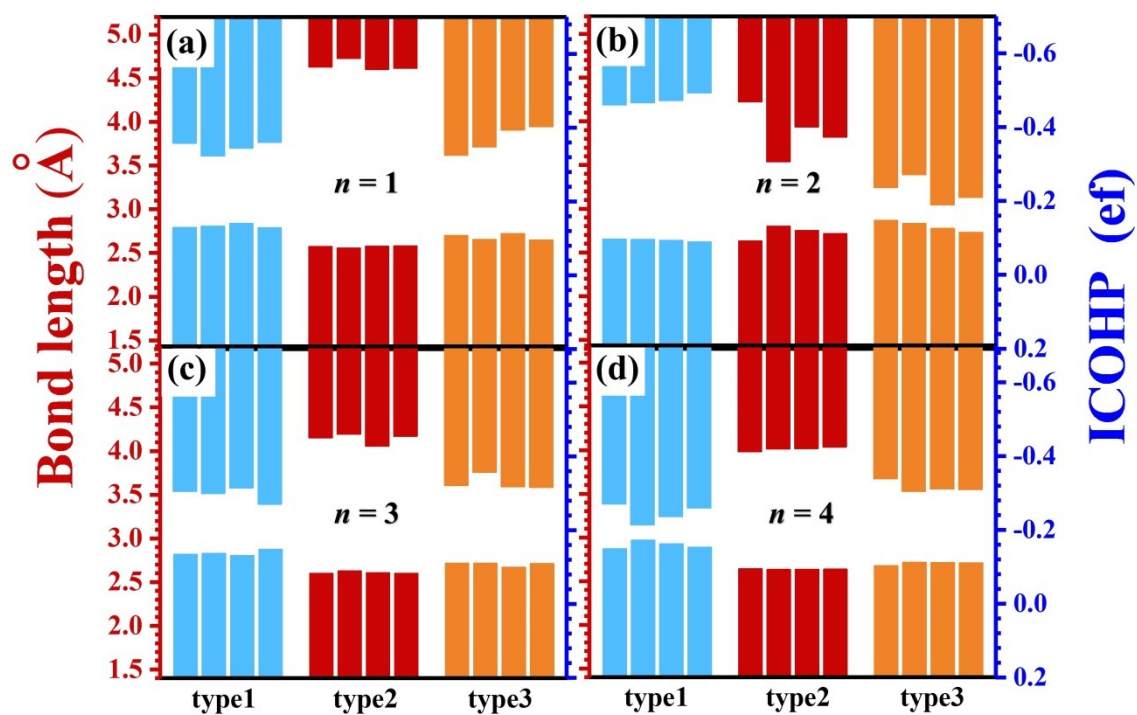

**Figure S13.** (a-d) The H-I bond length statistics and integrated crystal orbital Hamiltonian population (ICOHP) of  $(\text{ThDMA})\text{Cs}_{n-1}\text{Sn}_n\text{I}_{3n+1}$  ( $n = 1-4$ ), respectively.

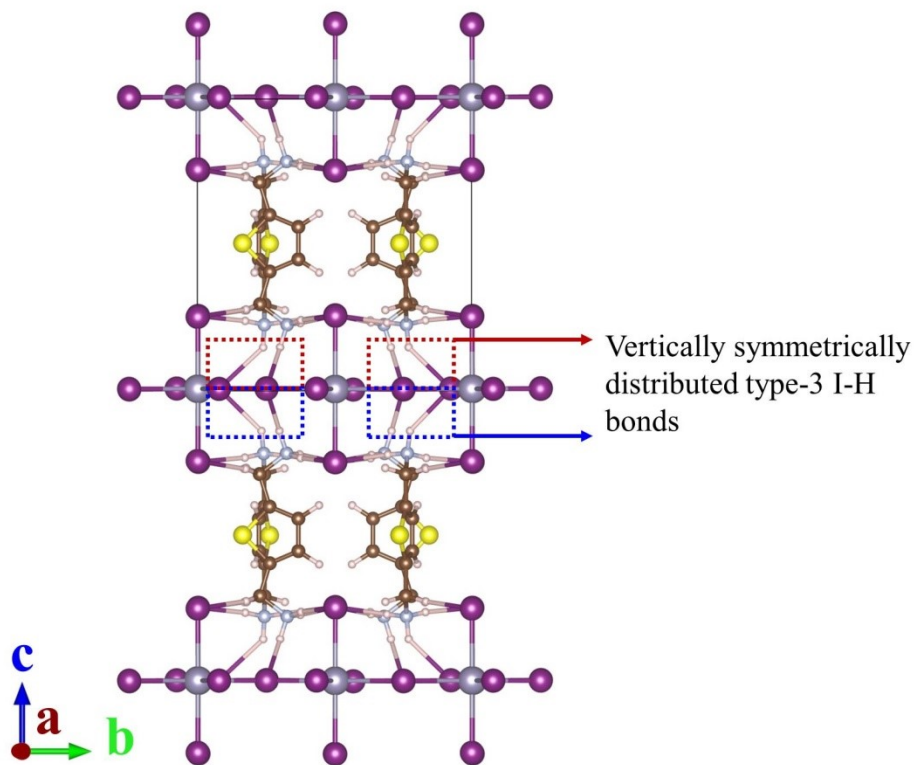

**Figure S14.** The type-3 I-H bonds vertically symmetrically distributed on both sides of the inorganic layer in  $(\text{ThDMA})\text{Cs}_{n-1}\text{Sn}_n\text{I}_{3n+1}$  ( $n = 1$ ) from the side view.

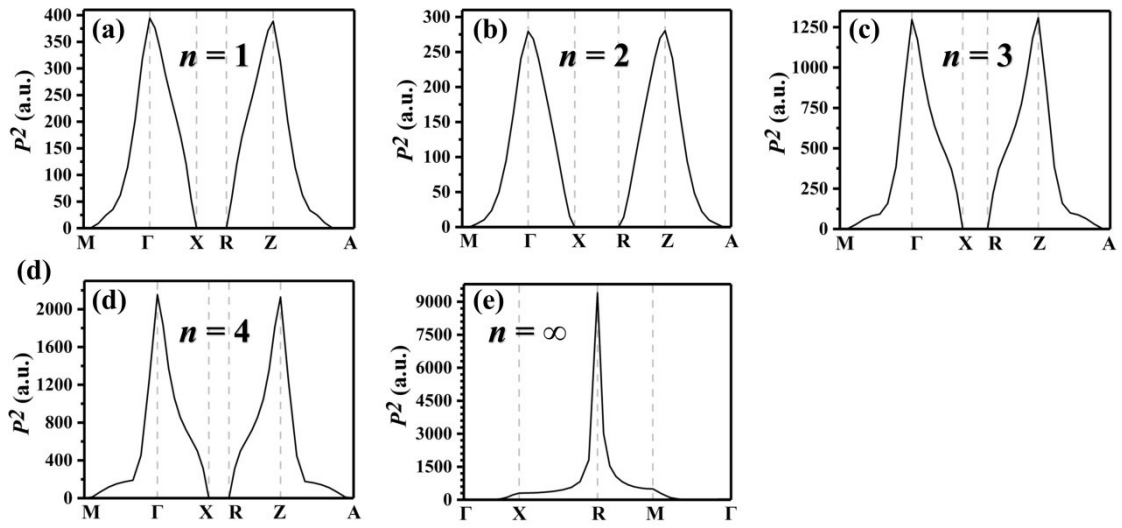

**Figure S15.** (a-e) The transition dipole moment (TDM) of  $(\text{ThDMA})\text{Cs}_{n-1}\text{Sn}_n\text{I}_{3n+1}$  ( $n = 1-4$  and  $\infty$ ) perovskites, respectively.



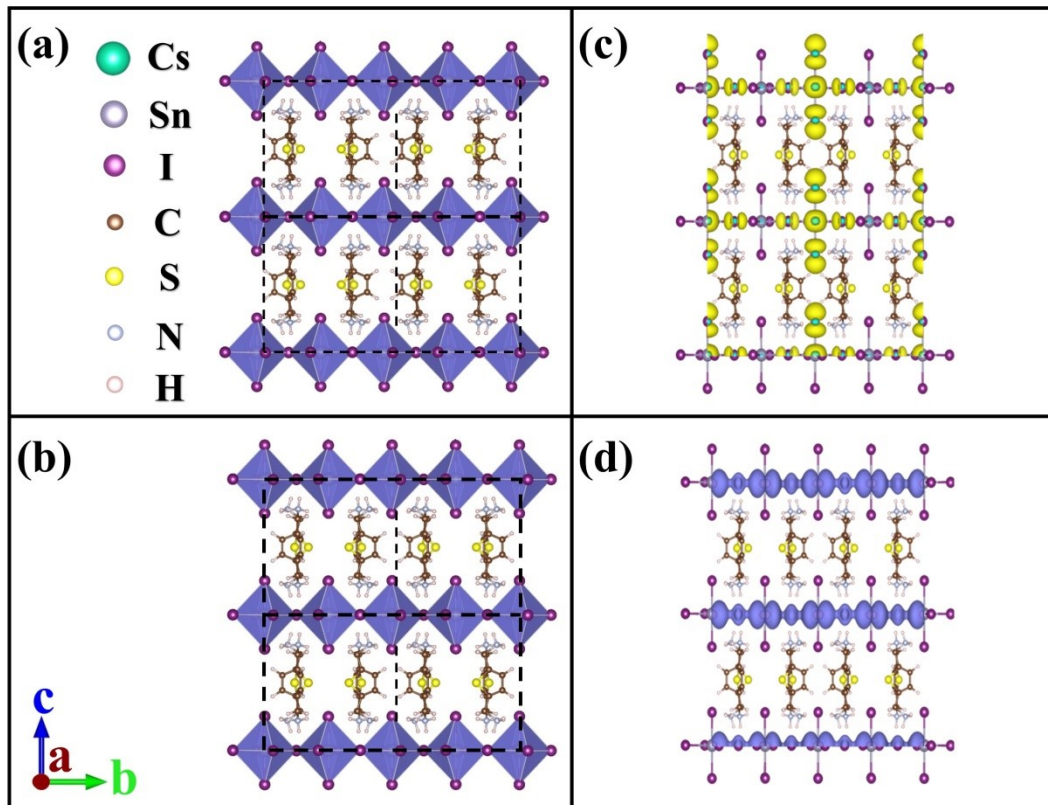

**Figure S16.** (a, b) The optimized polyhedron model of  $1 \times 2 \times 2$  supercell of  $(\text{ThDMA})\text{Cs}_{n-1}\text{Sn}_n\text{I}_{3n+1}$  ( $n = 1$ ) from the side view and (c, d) its partial charge densities on VBM and CBM states in the (100) crystal plane, respectively.

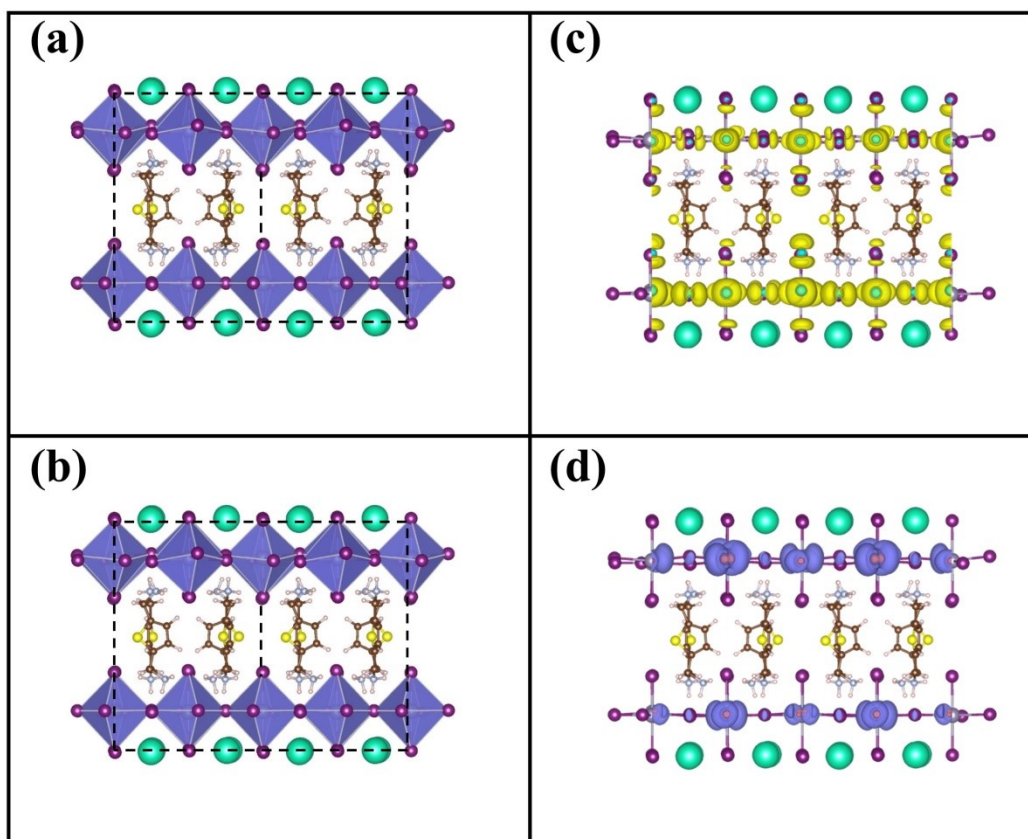

**Figure S17.** (a, b) The optimized polyhedron model of  $1 \times 2 \times 2$  supercell of  $(\text{ThDMA})\text{Cs}_{n-1}\text{Sn}_n\text{I}_{3n+1}$  ( $n = 2$ ) from the side view and (c, d) its partial charge densities on VBM and CBM states in the (100) crystal plane, respectively.

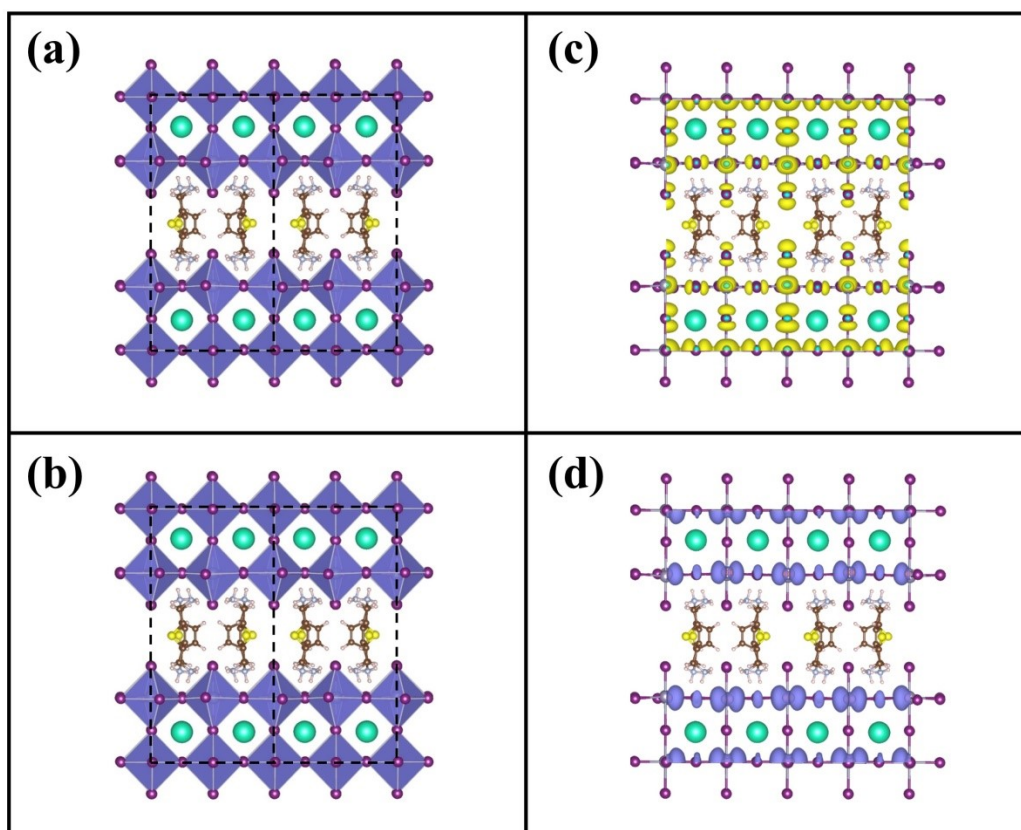

**Figure S18.** (a, b) The optimized polyhedron model of  $1 \times 2 \times 2$  supercell of  $(\text{ThDMA})\text{Cs}_{n-1}\text{Sn}_n\text{I}_{3n+1}$  ( $n = 3$ ) from the side view and (c, d) its partial charge densities on VBM and CBM states in the (100) crystal plane, respectively.

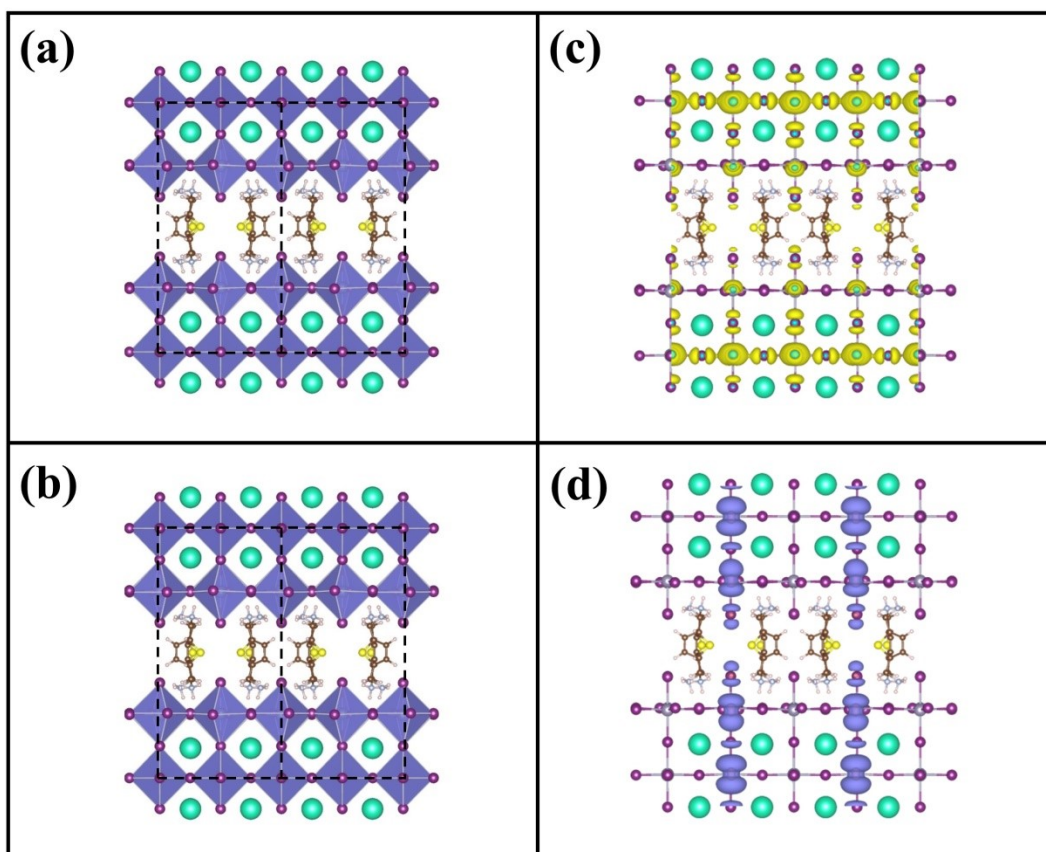

**Figure S19.** (a, b) The optimized polyhedron model of  $1 \times 2 \times 2$  supercell of  $(\text{ThDMA})\text{Cs}_{n-1}\text{Sn}_n\text{I}_{3n+1}$  ( $n = 4$ ) from the side view and (c, d) its partial charge densities on VBM and CBM states in the (100) crystal plane, respectively.

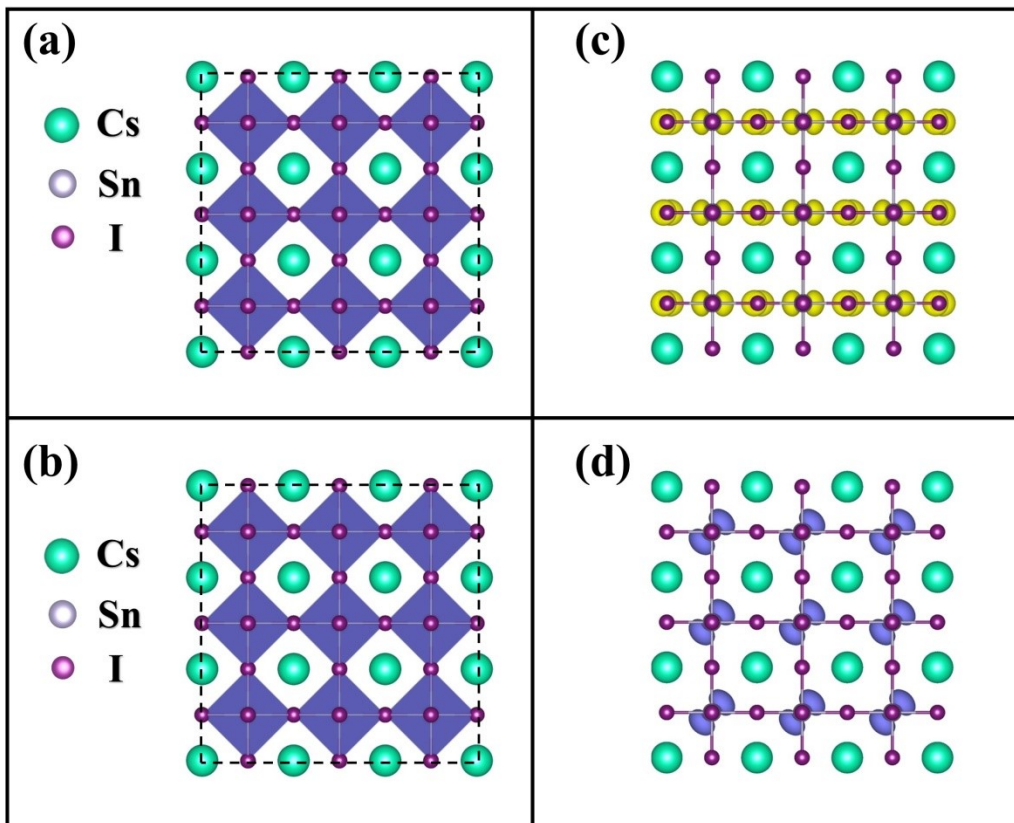

**Figure S20.** (a, b) The optimized polyhedron model of 3×3×3 supercell of CsSnI<sub>3</sub> unit cell and (c, d) its partial charge densities on VBM and CBM states, respectively.

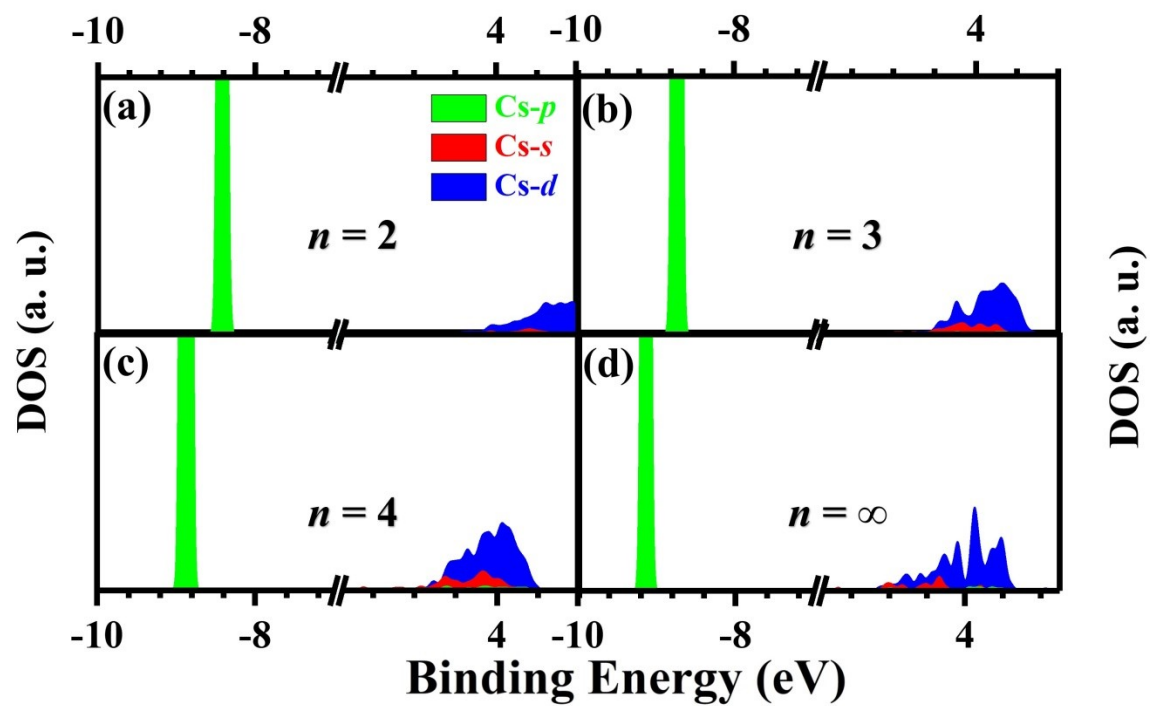

**Figure S21.** (a-d) Calculated PDOS of Cs<sup>-</sup> ions in (ThDMA)Cs<sub>*n*-1</sub>Sn<sub>*n*</sub>I<sub>3*n*+1</sub> with *n* = 2, 3, 4 and ∞, respectively.



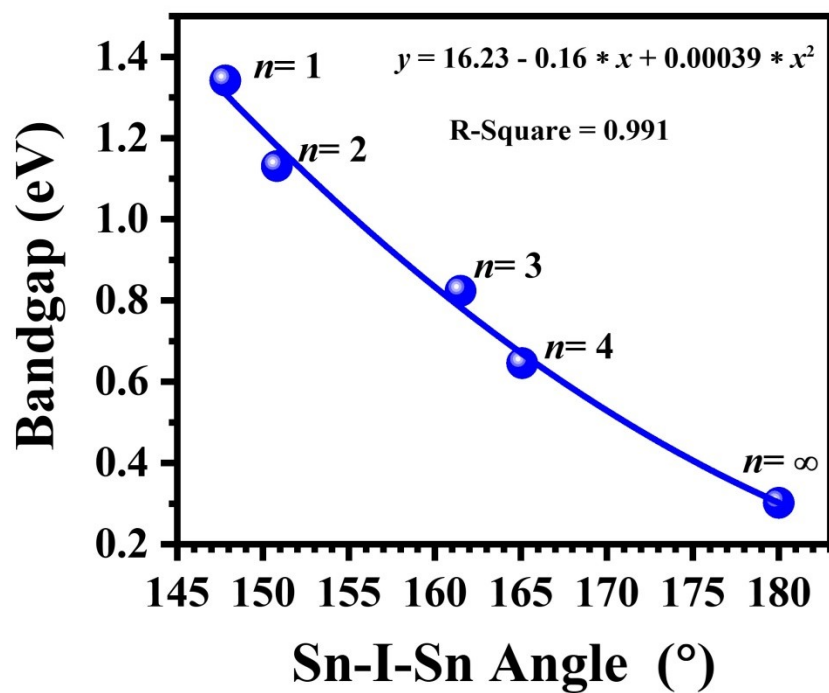

**Figure S22.** The calculated relationship between equatorial angles and bandgap employing polynomial fitting.

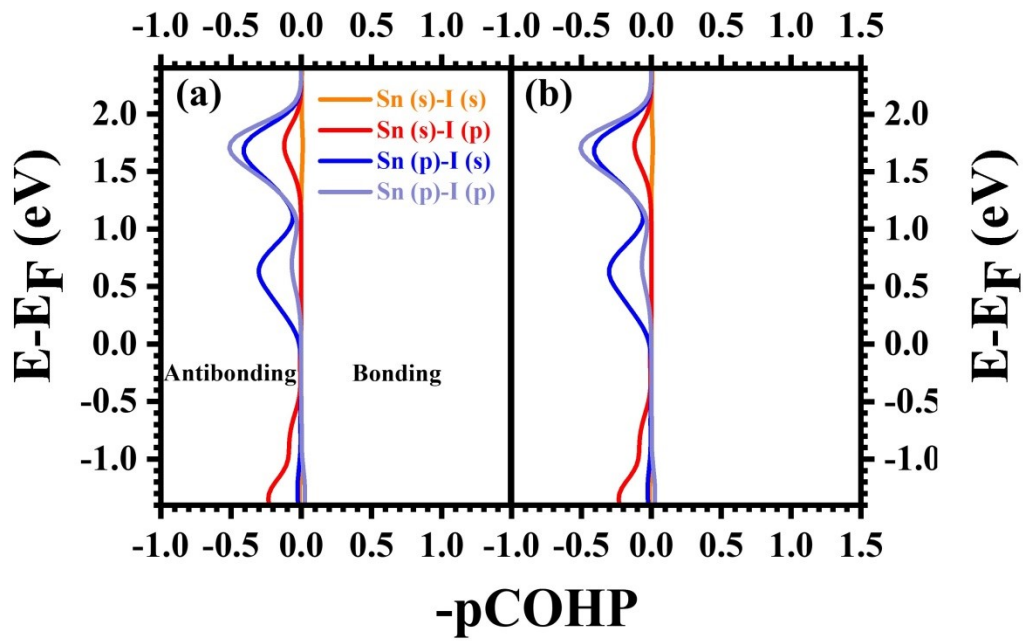

**Figure S23.** (a, b) Orbital-resolved COHP analysis for Sn and I atom of CsSnI<sub>3</sub> in (a) apical (vertical to inorganic layer) direction and (b) equatorial (parallel to inorganic layer) direction.



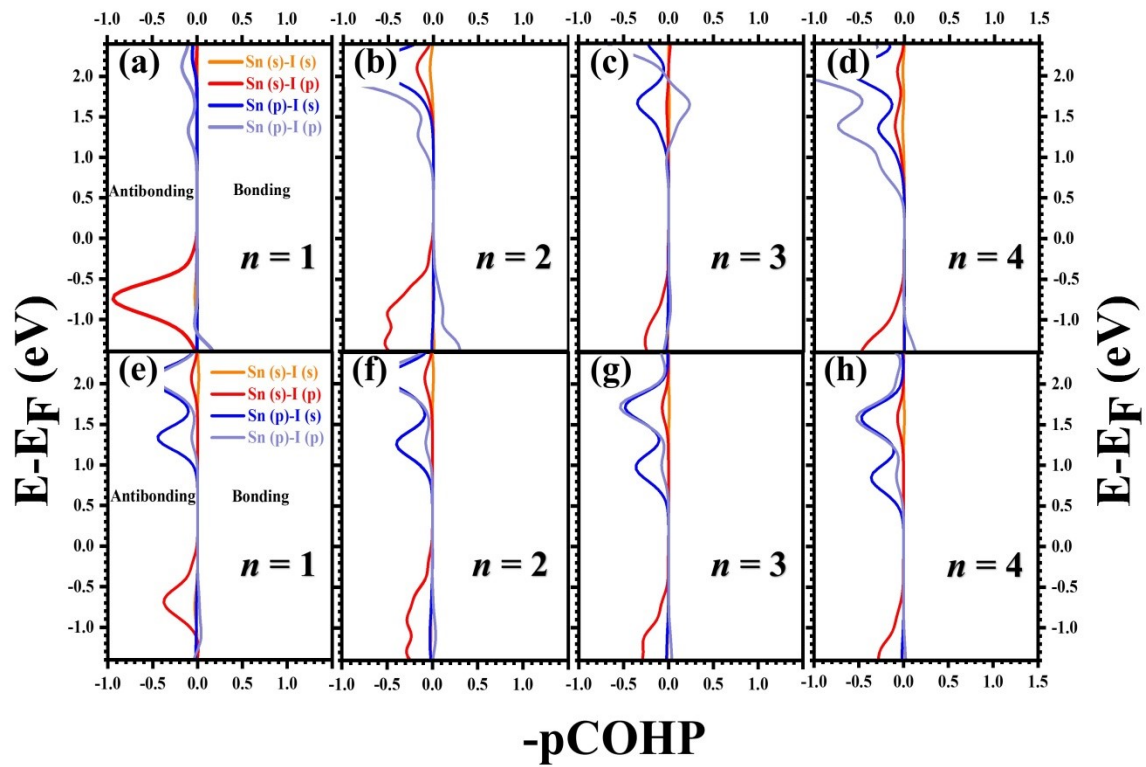

**Figure S24.** (a-h) Orbital-resolved COHP analysis for Sn and I atom of  $(\text{ThDMA})\text{Cs}_{n-1}\text{Sn}_n\text{I}_{3n+1}$  ( $n = 1-4$ ) in (a-d) apical and (e-h) equatorial direction.

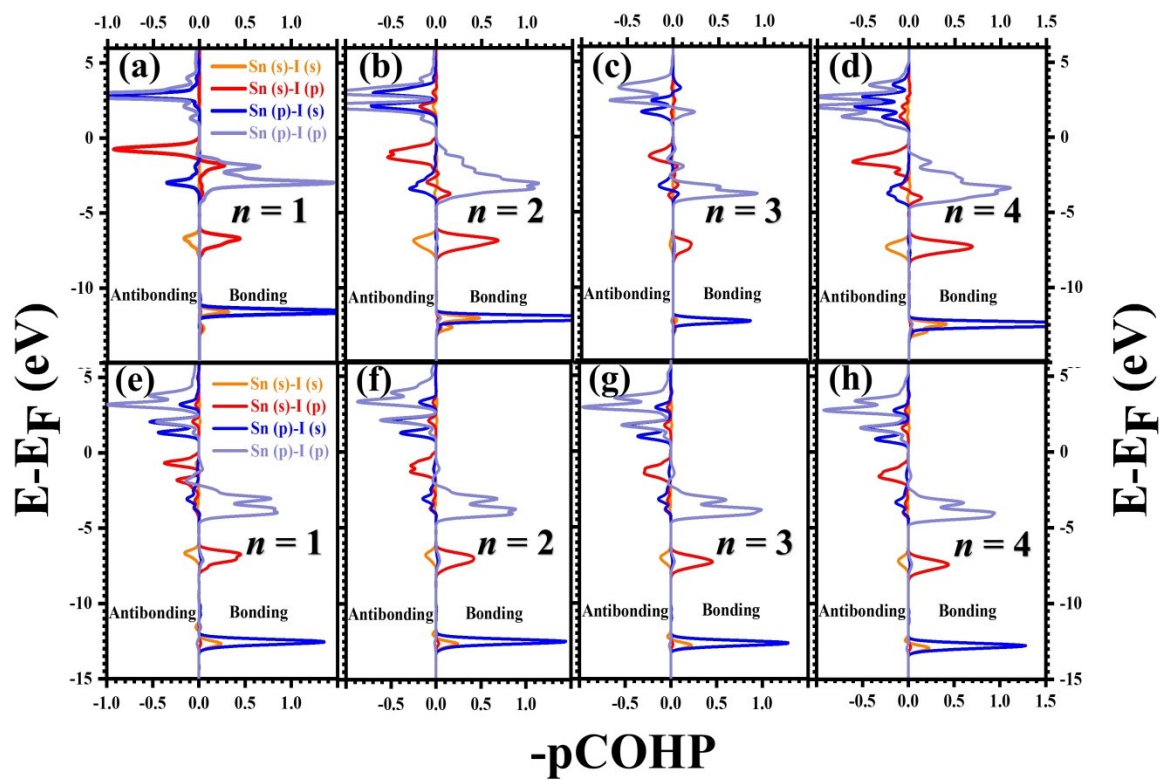

**Figure S25.** (a-h) Orbital-resolved COHP analysis for Sn and I atom of  $(\text{ThDMA})\text{Cs}_{n-1}\text{Sn}_n\text{I}_{3n+1}$  ( $n = 1-4$ ) in (a-d) apical and (e-h) equatorial direction.

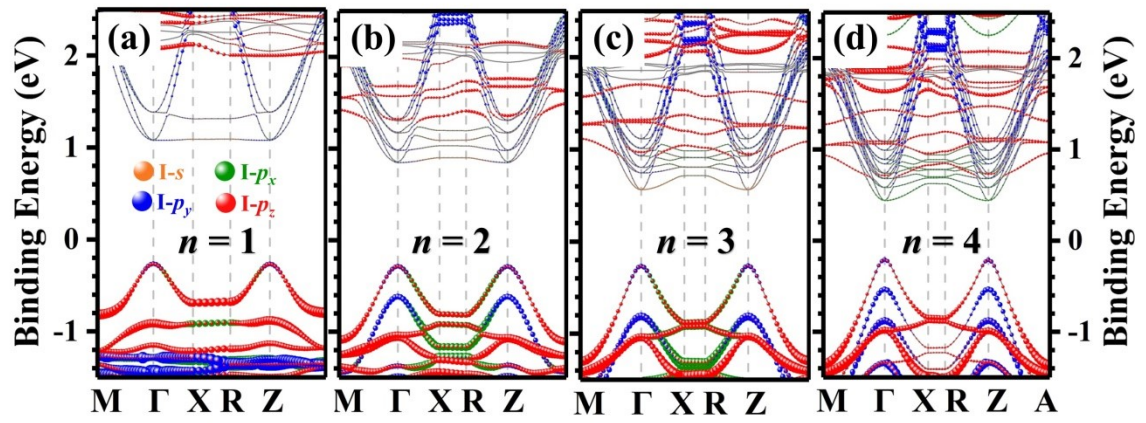

**Figure S26.** (a-d) Decomposed band structures of the  $s$ ,  $p$  orbitals of  $I^-$  ions for  $(ThDMA)Cs_n$ .  ${}_1Sn_nI_{3n+1}$  ( $n = 1-4$ ).

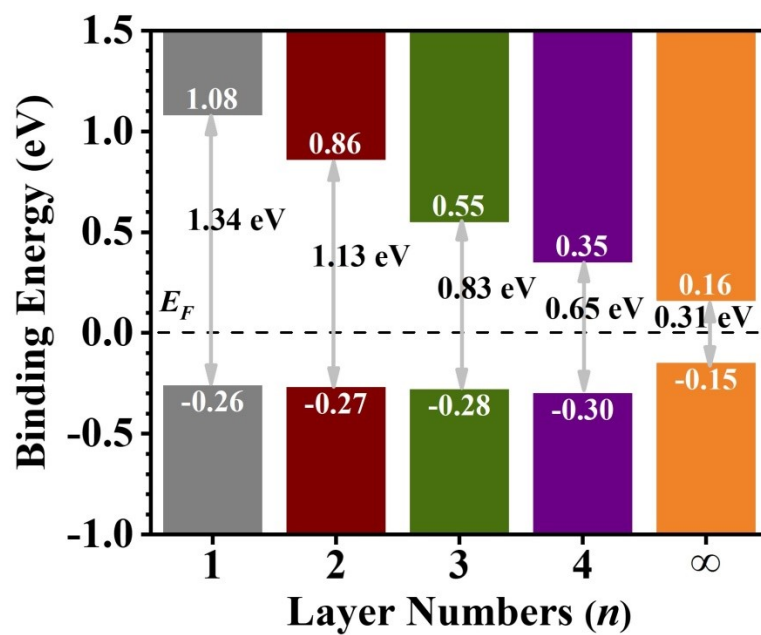

**Figure S27.** The calculated bandgap, energy level of CBM and VBM with respect to the Fermi level energies (Fermi level energies = 0).

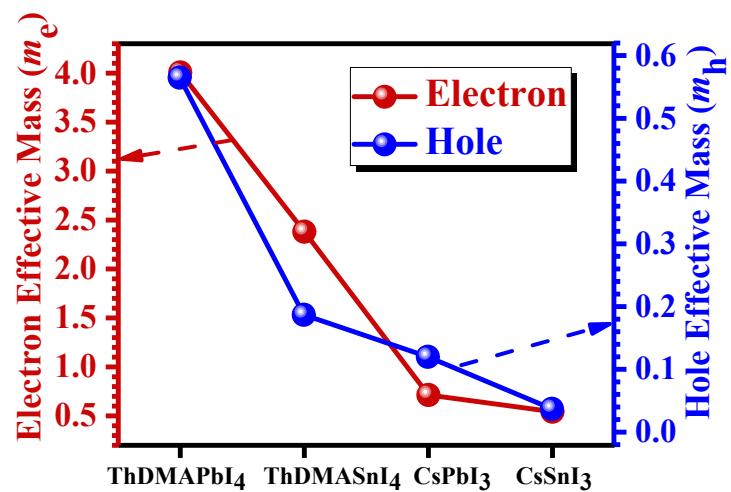

**Figure S28.** Hole and electron effective masses of ThDMAPbI<sub>4</sub>, ThDMASnI<sub>4</sub>, CsPbI<sub>3</sub> and CsSnI<sub>3</sub> perovskites.

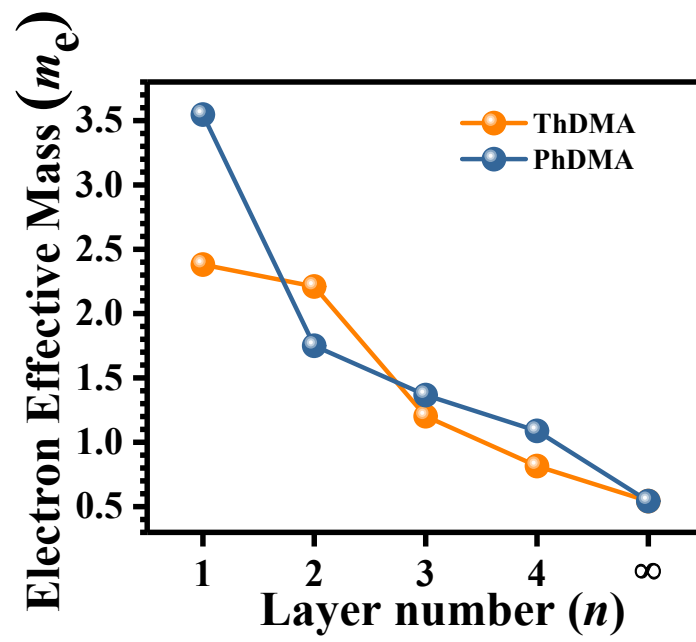

**Figure S29.** Electron effective masses of  $(\text{ThDMA})\text{Cs}_{n-1}\text{Sn}_n\text{I}_{3n+1}$  and  $(\text{PhDMA})\text{Cs}_{n-1}\text{Sn}_n\text{I}_{3n+1}$  perovskites.

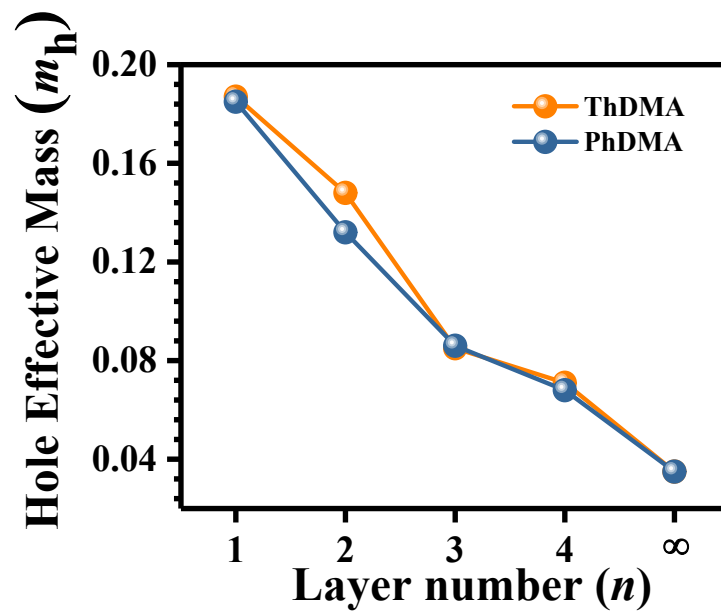

**Figure S30.** Hole effective masses of  $(\text{ThDMA})\text{Cs}_{n-1}\text{Sn}_n\text{I}_{3n+1}$  and  $(\text{PhDMA})\text{Cs}_{n-1}\text{Sn}_n\text{I}_{3n+1}$  perovskites.

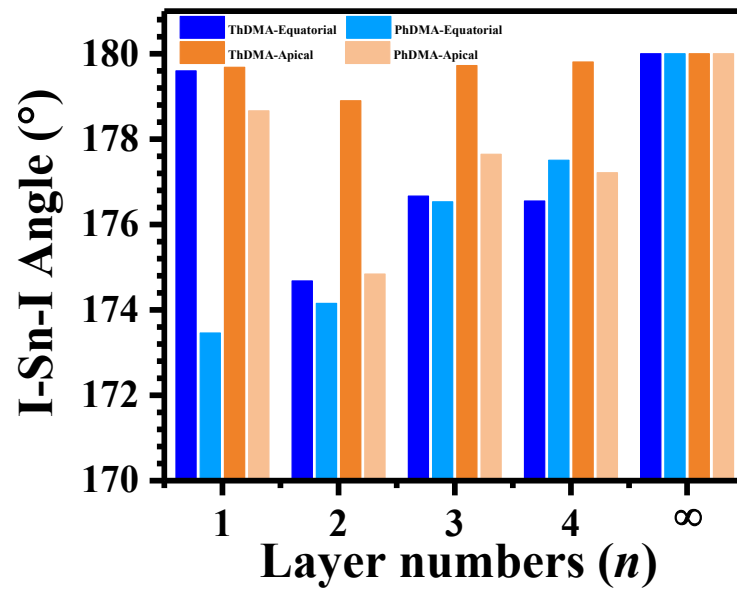

**Figure S31.** The calculated equatorial and apical I-Sn-I angles of  $(\text{ThDMA})\text{Cs}_{n-1}\text{Sn}_n\text{I}_{3n+1}$  and  $(\text{PhDMA})\text{Cs}_{n-1}\text{Sn}_n\text{I}_{3n+1}$  perovskites.



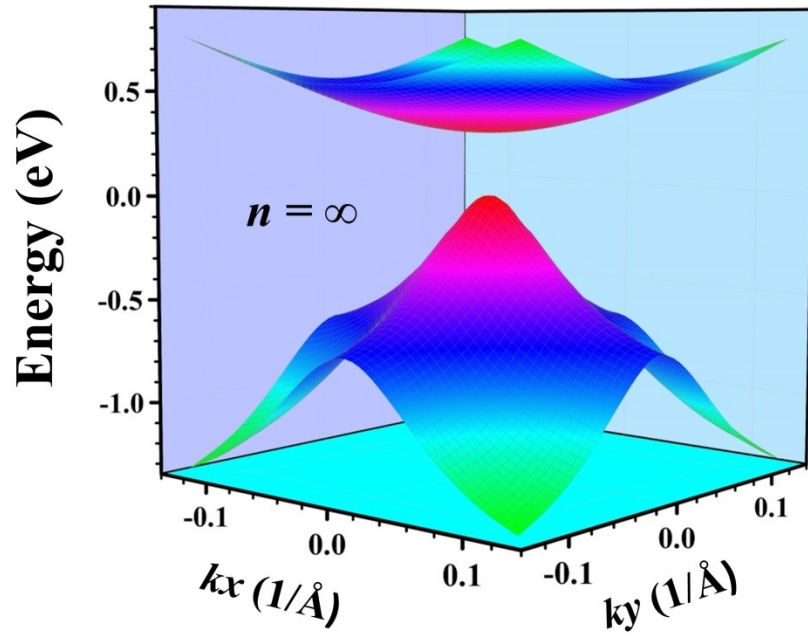

Figure S32 . Calculated 3D band structures of CsSnI<sub>3</sub> perovskites.

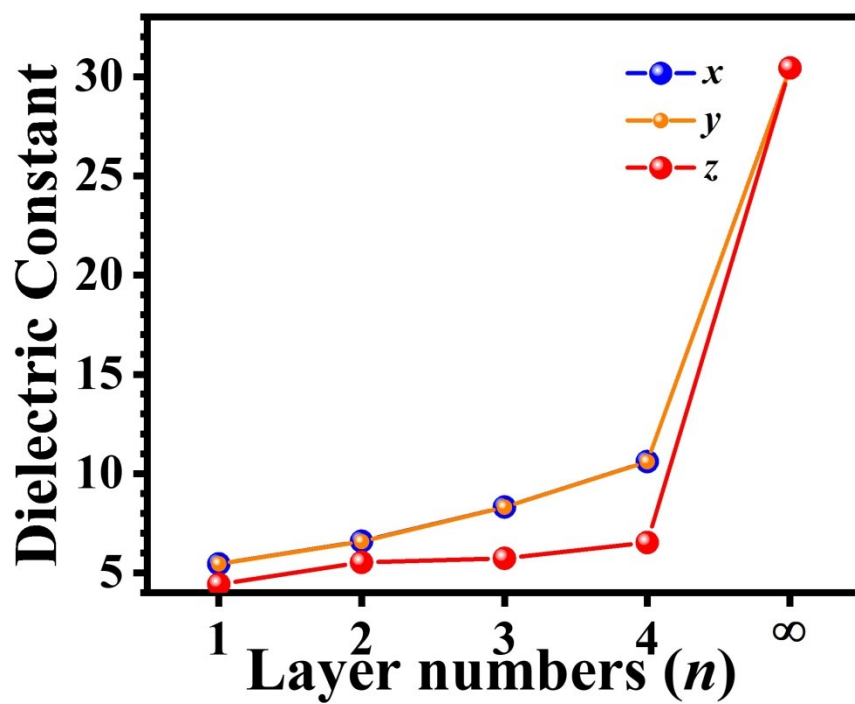

**Figure S33.** The dielectric constants of  $(\text{ThDMA})\text{Cs}_{n-1}\text{Sn}_n\text{I}_{3n+1}$  ( $n = 1-4$  and  $\infty$ ).

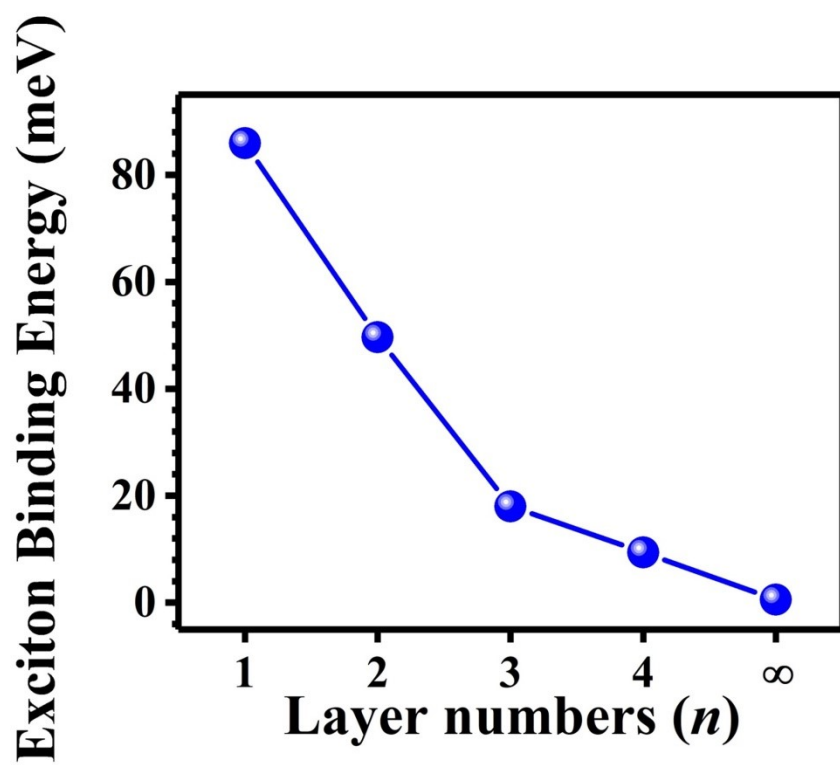

**Figure S34.** The exciton binding energies of  $(\text{ThDMA})\text{Cs}_{n-1}\text{Sn}_n\text{I}_{3n+1}$  ( $n = 1-4$  and  $\infty$ ).

**Table S1.** Calculated lattice parameters of (ThDMA)Cs<sub>n-1</sub>Sn<sub>n</sub>I<sub>3n+1</sub> ( $n = 1-4$  and  $\infty$ ) perovskites.

| $n$             | 1         | 2         | 3         | 4         | $\infty$ (unit cell) | References <sup>1</sup><br>( $\alpha$ -CsSnI <sub>3</sub> ) |
|-----------------|-----------|-----------|-----------|-----------|----------------------|-------------------------------------------------------------|
| $a(\text{\AA})$ | 12.040(5) | 12.092(5) | 12.316(3) | 12.289(0) | 6.210(7)             | 6.219(0)                                                    |
| $b(\text{\AA})$ | 12.041(3) | 12.089(3) | 12.316(4) | 12.288(3) | 6.210(7)             | 6.219(0)                                                    |
| $c(\text{\AA})$ | 12.813(6) | 18.915(0) | 25.380(3) | 31.372(0) | 6.210(7)             | 6.219(0)                                                    |
| $\alpha$        | 90.005(8) | 90.051(9) | 89.997(2) | 89.996(8) | 90.000(0)            | 90.000(0)                                                   |
| $\beta$         | 89.994(1) | 90.180(5) | 90.000(5) | 89.998(3) | 90.000(0)            | 90.000(0)                                                   |
| $\gamma$        | 90.007(7) | 90.106(6) | 90.000(3) | 90.003(3) | 90.000(0)            | 90.000(0)                                                   |
| Number of atom  | 104       | 124       | 144       | 164       | 5                    | 5                                                           |

---

**Table S2.** Sn-I bond lengths, I-Sn-I angles and Sn-I-Sn angles of (ThDMA)Cs<sub>n-1</sub>Sn<sub>n</sub>I<sub>3n+1</sub> (*n* = 1) perovskites.

| Label         | i-th layer | 1           |
|---------------|------------|-------------|
|               | Equatorial | 3.1337(1)   |
| Sn-I bond     | Apical     | 3.2028(4)   |
|               | Average    | 3.1682(7)   |
|               | Equatorial | 179.5986(9) |
| I-Sn-I angle  | Apical     | 179.6854(8) |
|               | Average    | 179.6420(8) |
|               | Equatorial | 147.8076(3) |
| Sn-I-Sn angle | Apical     | -           |
|               | Average    | 147.8076(3) |

---

---

**Table S3.** Sn-I bond lengths, I-Sn-I angles and Sn-I-Sn angles of (ThDMA)Cs<sub>n-1</sub>Sn<sub>n</sub>I<sub>3n+1</sub> (*n* = 2) perovskites.

| Label         | i-th layer | 1           | 2           |
|---------------|------------|-------------|-------------|
| Sn-I bond     | Equatorial | 3.1243(2)   | 3.1269(8)   |
|               | Apical     | 3.2132(6)   | 3.1912(5)   |
|               | Average    | 3.1687(9)   | 3.1591(2)   |
| I-Sn-I angle  | Equatorial | 175.6956(3) | 173.6599(3) |
|               | Apical     | 178.9178(5) | 178.8855(3) |
|               | Average    | 177.3067(4) | 176.2727(3) |
| Sn-I-Sn angle | Equatorial | 150.8917(9) | 150.7150(3) |
|               | Apical     | 177.1394(8) | -           |
|               | Average    | 164.0156(3) | 150.7150(3) |

---

---

**Table S4.** Sn-I bond lengths, I-Sn-I angles and Sn-I-Sn angles of (ThDMA)Cs<sub>*n*-1</sub>Sn<sub>*n*</sub>I<sub>3*n*+1</sub> (*n* = 3) perovskites.

| Label         | i-th layer | 1           | 2           | 3           |
|---------------|------------|-------------|-------------|-------------|
| Sn-I bond     | Equatorial | 3.1765(6)   | 3.07925(5)  | 3.1791(5)   |
|               | Apical     | 3.1963(9)   | 3.1840(8)   | 3.2064(5)   |
|               | Average    | 3.1864(7)   | 3.1316(7)   | 3.1928(0)   |
| I-Sn-I angle  | Equatorial | 175.1237(3) | 179.7021(5) | 175.1773(0) |
|               | Apical     | 179.7356(8) | 179.9255(3) | 179.5086(8) |
|               | Average    | 177.4297(0) | 179.8138(4) | 177.3429(9) |
| Sn-I-Sn angle | Equatorial | 151.6682(0) | 178.8908(8) | 153.9131(5) |
|               | Apical     | 179.6293(3) | 179.4192(0) | -           |
|               | Average    | 165.6487(6) | 179.1550(4) | 153.9131(5) |

---

**Table S5.** Sn-I bond lengths, I-Sn-I angles and Sn-I-Sn angles of (ThDMA)Cs<sub>n-1</sub>Sn<sub>n</sub>I<sub>3n+1</sub> ( $n = 4$ ) perovskites.

| Label         | i-th layer | 1           | 2           | 3           | 4           |
|---------------|------------|-------------|-------------|-------------|-------------|
| Sn-I bond     | Equatorial | 3.1723(7)   | 3.0729(6)   | 3.0724(7)   | 3.1634(1)   |
|               | Apical     | 3.1879(4)   | 3.1595(6)   | 3.1451(5)   | 3.1697(3)   |
|               | Average    | 3.1801(6)   | 3.1162(6)   | 3.1088(1)   | 3.1665(7)   |
| I-Sn-I angle  | Equatorial | 174.7466(8) | 177.7831(5) | 178.6861(6) | 174.9933(3) |
|               | Apical     | 179.8104(3) | 179.8460(3) | 179.7896(5) | 179.7861(3) |
|               | Average    | 177.2785(5) | 178.8145(9) | 179.2379(1) | 177.3897(3) |
| Sn-I-Sn angle | Equatorial | 151.2731(5) | 177.8214(1) | 178.6821(0) | 152.5421(1) |
|               | Apical     | 179.8007(5) | 179.6580(5) | 179.6094(8) | -           |
|               | Average    | 165.5369(5) | 178.7397(3) | 179.1457(9) | 152.5421(1) |

#### References

- [1] L.Y. Huang and W. R. L. Lambrecht, *Phys. Rev. B*, 2013, **88**, 165203.
